# Supplementary material for: LobE-Specific lymph node diSsectiON for clinical early-stage non-small cell lung cancer: protocol for a randomised controlled trial (the LESSON trial)
Source: HighWire-hosted journal article supplement (doi:10.1136/bmjopen-2021-056043), 2022-08-01
Supplement: bmjopen-2021-056043supp001_data_supplement.pdf [file bmjopen-2021-056043supp001_data_supplement.pdf]

版本号: V3.0

版本日期: 2021 年 5 月 16 日

# 肺叶特异性淋巴结清扫术在早期非小细胞肺癌中的可行性研究方案知情同意书

## 尊敬的受试者

我们邀请您参加四川大学华西医院 SCI 经费支持下批准开展的“肺叶特异性淋巴结清扫术在早期非小细胞肺癌中的可行性研究方案”课题研究。本研究将在四川大学华西医院开展,估计将有 1300 名受试者自愿参加。本研究已经得到四川大学华西医院生物医学伦理审查委员会的审查和批准。

### 1. 为什么要开展本研究?

肺癌已成为中国乃至全世界最常见的恶性肿瘤和癌症相关死亡的主要原因。肺癌主要由小细胞肺癌和非小细胞肺癌组成,非小细胞肺癌占有所有肺癌的约 85%。随着医学筛查方法的进步,越来越多的早期非小细胞肺癌被发现。目前,手术仍然是早期非小细胞肺癌的首选治疗方案,最近的指南都建议解剖性肺切除术和系统性淋巴结清扫或系统性淋巴结采样作为治疗临床 I 期非小细胞肺癌标准治疗方案。然而,最近,由于先前的文献提示非小细胞肺癌中的淋巴结转移模式被认为是肺叶特异性的,因此有学者提出了肺叶特异性淋巴结清扫作为系统性淋巴结清扫治疗早期非小细胞肺癌的替代方案。在我们的前期研究中,通过将所有最新证据研究汇集在一起来进行全面的荟萃分析,以比较肺叶特异性淋巴结清扫和系统性淋巴结清扫在治疗早期非小细胞肺癌中的作用。我们的研究发现与系统性淋巴结清扫相比,肺叶特异性淋巴结清扫的术后并发症的发生风险显著降低且不会影响患者的长期肿瘤学结果,因此肺叶特异性淋巴结清扫可以替代系统性淋巴结清扫作为治疗早期非小细胞肺癌的淋巴结清扫方案。然而,在以往的队列研究和临床指南中,并没有关于肺叶特异性淋巴结清扫清扫范围一致而确切的定义,因此肺叶特异性淋巴结清扫在早期非小细胞肺癌中的清扫范围仍待进一步研究和确立,需要进一步的研究去确定肺叶特异性淋巴结清扫的治疗作用以及肺叶特异性淋巴结清扫清扫范围的精确定义。因此,本新技术课题组拟行以下探究方案来开创性地提出早期非小细胞肺叶特异性淋巴结清扫术的新技术理念:根据我们开创性提出的早期非小细胞肺癌肺叶特异性淋巴结清扫的方案,开展前瞻性随机对照研究,对于肺叶特异性淋巴结清扫术和系统性淋巴结清扫术在治疗早期非小细胞肺癌中的效果,为肺叶特异性淋巴结清扫术作为早期非小细胞肺癌治疗可选方案之一提供决定性依据。

### 2. 如果参加研究,您需要做什么?

如果您同意参与这项研究,我们将对每位受试者进行编号,建立病历档案。由于临床诊断或治疗需要,您将会被随机分配进入系统性淋巴结清扫术组或肺叶特异性淋巴结清扫术组,手术中切除的组织除供临床常规病理检查,术后按照标准的复查随访方案进行随访汇报总结。您的病例报告(个人基本信息除外)会发表于全球性的网站和期刊上,印刷版本和网络版本会供医生、媒体、大众阅读。

### 3. 可供选择的诊疗方案有哪些?

目前可供选择的早期肺癌的淋巴结清扫方式包括:系统性淋巴结清扫术或淋巴结采样术

### 4. 哪些人不宜参加研究?

1. 在手术前已行抗肿瘤治疗（放疗、化疗、靶向治疗、免疫治疗）的患者；2. 既往有其他恶性肿瘤病史的患者；3. 入组时合并第二原发癌的患者；4. 中央型肺癌；5. 小细胞肺癌；6. 既往有单侧开胸手术病史；7. 怀孕或处于哺乳期的妇女；8. 间质性肺炎、肺纤维化或严重肺气肿；9. 难以控制的活动性细菌或真菌感染；10. 严重的精神疾病；11. 近6个月内有严重心脏病、心力衰竭、心肌梗塞或心绞痛发作史。

#### 5. 参加研究有哪些风险？

对于您来说，所有的信息将是保密的。您的手术将由专业人员如外科医师操作。参加研究的风险与手术治疗风险等同，即：术中或者术后大出血；术中损伤神经、血管或邻近器官；手术切口并发症；血栓栓塞；呼吸系统并发症；循环系统并发症；尿路感染及肾衰；脑血管意外；肝功能不全等。

本研究中使用的研究治疗或操作可能会对您产生副作用，也可能不会。副作用可从轻度至非常严重不等，因人而异。参加本研究的所有患者都将被密切关注任何副作用。以下是关于副作用的要点：

- 部分风险可能很快消失，部分可能持续较长时间，部分可能一直存在。
- 一些风险可能严重，甚至可能导致死亡。

如果您注意或感觉到任何异常，请告知研究医生以便他/她能查看您是否出现了副作用。研究医生可能会治疗副作用或调整研究治疗，以减轻副作用。如果您住得很远或是由于其他原因而无法赶到研究中心，您需要前往您当地的卫生保健专业服务提供者或当地的急诊服务处。确保带上您的患者（身份识别）卡，此卡将在开始研究治疗时提供给您，以方便您与研究医生联系。

#### 6. 参加研究有哪些可能的益处？

参加本项研究，您的病情有可能获得改善，本项研究还有助于确定哪种治疗方法可以更安全有效地治疗与您具有相似病情的其他病人。参加本研究可能无法改善您的健康状况。即使您没有直接获益，其他人可能从本研究得出的结果中获益。同时本研究会给予受试者补贴相应的交通和检查费：交通费：100元/人；术后一月胸部CT检查补贴费：100元/人。

#### 7. 参加研究需要支付有关费用吗？

本研究参与的受试者无需支付相关费用，如果出现与研究相关的损伤时，将依据国家有关规定提供相应的治疗与赔偿。如果您觉得您因为参与本研究而受到了损害，请务必告诉您的研究医生。如果您由于参与本研究而受到损害，您将得到治疗。您的研究医生将向您解释治疗方案，并告诉您可以在哪里获得治疗。

请您严格遵从研究医生的指导，如果您在本研究过程中发生了损害/伤害，请立即与研究医生联系，研究医生将向您提供合理且必要的医疗诊治。如果您出现了与研究相关的损害/伤害，申办方将根据中国相关法律和法规向您赔付治疗该损害/伤害的合理且必要的费用，并提供适当的补偿。与研究相关的损害/伤害是指由于研究药物给药和/或研究方案中描述的研究操作的执行直接引起的，但不包括下列任何一项造成的损害/伤害：

- 与研究药物或研究方案规定的步骤不相关；
- 因您原有身体状况或基础疾病的自然进展所导致；
- 因医疗事故导致；
- 因您自己的疏忽、过错或故意的不当行为导致（例如未严格遵守本知情同意书、研究方案、研究医生或研究工作人员提供的指导）；

签署此知情同意书不会导致您失去任何合法权利。

#### 8. 个人信息是保密的吗？

您的研究资料将保存在四川大学华西医院，研究者、研究主管部门、伦理审查委员会可查阅您的医疗记录。任何有关本项研究结果的公开报告将不会披露您的个人身份。我们将在

法律允许的范围内，尽一切努力保护您个人医疗资料的隐私和个人信息。

**9. 我必须参加研究吗？**

参加本项研究是完全自愿的，您可以拒绝参加研究，或在试验的任何阶段随时退出本研究而不会受到歧视和报复，其医疗待遇与权益不受影响。如果您决定退出本研究，请与您的医生联系，以便妥善诊疗疾病。

---

**受试者声明：**我已经阅读了上述有关本研究的介绍，我的研究人员已向我充分解释和说明了本研究的目的、操作过程以及参加本研究可能存在的风险和潜在的获益，并回答了我所有相关问题。自愿参加本研究。

**我同意 ☐ 或拒绝 ☐ 除本研究以外的其他研究利用我的研究资料和生物标本。**

受试者正楷姓名：\_\_\_\_\_

受试者签名：\_\_\_\_\_ 日期：\_\_\_\_年\_\_\_\_月\_\_\_\_日

受试者的联系电话：\_\_\_\_\_ 手机号：\_\_\_\_\_

法定代理人正楷姓名：\_\_\_\_\_（如适用）

与受试者关系：\_\_\_\_\_

法定代理人签名：\_\_\_\_\_ 日期：\_\_\_\_年\_\_\_\_月\_\_\_\_日

需法定代理人签署的原因：\_\_\_\_\_

见证人正楷姓名：\_\_\_\_\_（如适用）

见证人签名：\_\_\_\_\_ 日期：\_\_\_\_年\_\_\_\_月\_\_\_\_日

需见证人签署的原因：\_\_\_\_\_

**医生声明：**我已对上述参加本研究的自愿者说明了该项研究的有关细节，并且为他/她提供一份签署过的知情同意书的原件。我确认已向受试者详细解释了本研究的情况，特别是参加本研究可能产生的风险与受益、免费与补偿、损害与赔偿、自愿与保密等伦理原则和要求。

医生签名：\_\_\_\_\_ 日期：\_\_\_\_年\_\_\_\_月\_\_\_\_日

医生的联系电话：\_\_\_\_\_

**四川大学华西医院生物医学伦理审查委员会 联系电话：028-85422654，028-85423237**
